# Supplementary material for: Preparation of ionic liquid-modified SiO2@Fe3O4nanocomposite as a magnetic sorbent for use in solid-phase extraction of zinc(ii) ions from milk and water samples
Source: Royal Society of Chemistry journal article supplement (doi:10.1039/c7ra02126g), 2017-01-01
Supplement: c7ra02126g1.pdf [file c7ra02126g1.pdf]

## Electronic Supplementary Material

# Preparation of ionic liquid-modified $\text{SiO}_2@Fe_3O_4$ nanocomposite as a magnetic sorbent for use in solid phase extraction of zinc(II) ions from milk and water samples

Hossein Abdolmohammad-Zadeh\*, Sima Hassanlouei, Monireh Zamani-Kalajahi

*Department of Chemistry, Faculty of Sciences, Azarbaijan Shahid Madani University, 35 Km  
Tabriz-Marageh Road, P.O. Box 53714-161, Tabriz, Iran*

\* Corresponding author. Tel.: +98 4134327500; Fax: +98 4134327541.

E-mail addresses: h.abdol@azaruniv.edu, h\_abdol@yahoo.com

### *Effect of the nano-sorbent amount and extraction time*

In order to obtain quantitative extraction of the analyte, the influence of the amount of nano-sorbent on recovery was studied in the range of 10–100 mg. A test solution of 150 mL of sample including  $5 \text{ ng mL}^{-1}$  Zn(II) ions was employed. As shown in Fig. 1S, the quantitative recovery of Zn(II) ion was obtained within the range of 50–100 mg of the nano-sorbent. From these results, 50 mg of the nano-sorbent was used in all further experiments.

The extraction recovery was studied at time intervals in the range of 1–20 min. It was observed that after 10 min the recoveries of the Zn(II) ions exhibited no obvious variation (Fig. 2S). Thus, the extraction time of 10 min was selected for further studies.

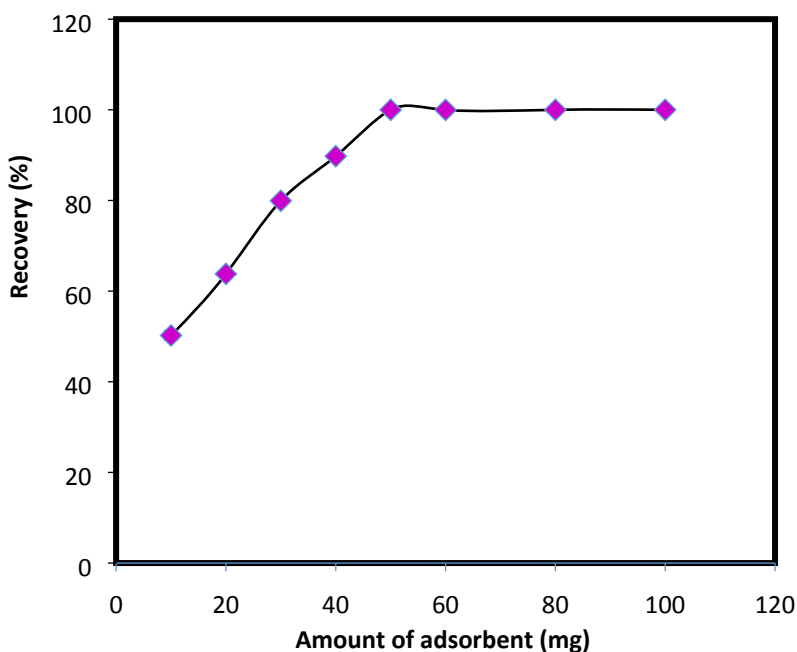

**Fig. 1S:** *Effect of amount of the adsorbent on the adsorption of Zn(II) ions by  $\text{Fe}_3\text{O}_4@\text{SiO}_2@\text{IL}$  nano-sorbent. Utilized conditions: sample volume: 150.0 mL, Zn(II) ions concentration:  $5 \text{ ng mL}^{-1}$ , pH: 9, extraction time :10 min, elution condition: 1.5 mL of the  $0.5 \text{ mol L}^{-1}$  of  $\text{HNO}_3$  in ethanol, desorption time: 4 min.*

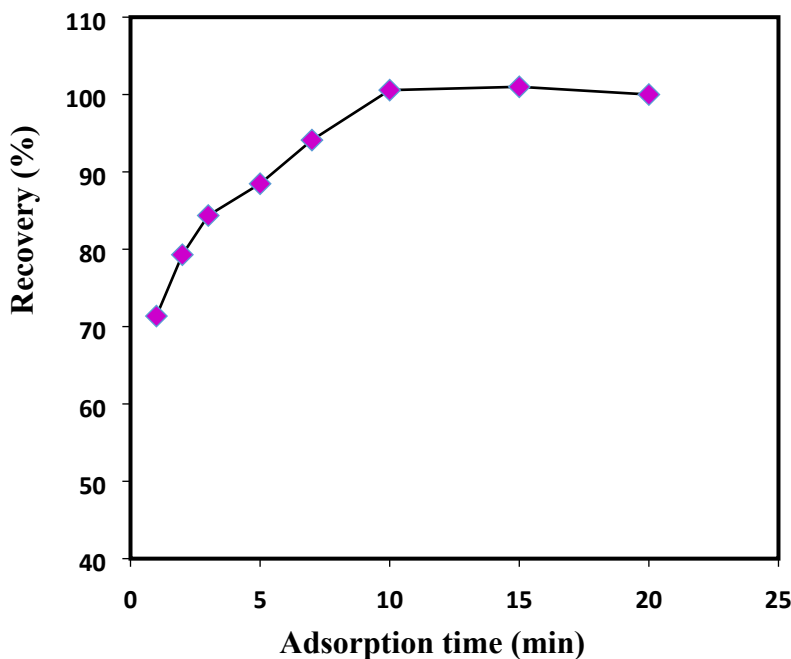

**Fig. 2S:** Effect of extraction time on the adsorption of Zn(II) ions by  $Fe_3O_4@SiO_2@IL$  nanosorbent. Utilized conditions: sample volume: 150.0 mL, Zn(II) ions concentration: 5 ng mL<sup>-1</sup>, pH: 9, amount of the nanosorbent: 50.0 mg, elution condition: 1.5 mL of the 0.5 mol L<sup>-1</sup> of HNO<sub>3</sub> in ethanol, desorption time: 4 min.

#### *Sample volume and pre-concentration factor*

An important parameter to control solid-phase extraction of real samples is the sample volume. For this purpose, 10, 25.0, 50.0, 100.0, 150.0, 200.0 and 250.0 mL of sample solutions containing 1.5 µg of Zn(II) ions were studied. Based on the obtained results that are given in Fig. 3S, recovery of Zn(II) ions was found to be quantitative when sample volume was chosen between 10.0 and 150.0 mL. Above 150.0 mL, the recovery decreased for the analyte. So, by analyzing 1.5 mL of the final solution after the pre-concentration of 150.0 mL of sample solution, an enrichment factor was found as 100.

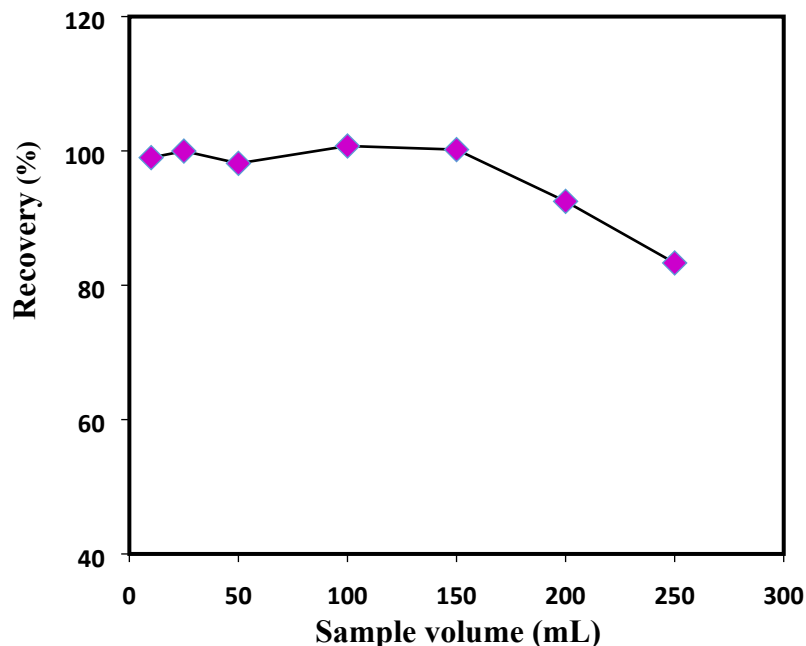

**Fig. 3S:** Effect of sample volume on the adsorption of Zn(II) ions by  $Fe_3O_4@SiO_2@IL$  nanosorbent. Utilized conditions: Zn(II) ions concentration:  $5 \text{ ng mL}^{-1}$ , pH: 9, amount of the nanosorbent: 50.0 mg, extraction time :10 min, elution condition: 1.5 mL of the  $0.5 \text{ mol L}^{-1}$  of  $HNO_3$  in ethanol, desorption time: 4 min.

#### Calibration graph

A calibration graph was constructed in the optimum solid-phase extraction and detection conditions. The calibration graph was linear between  $0.5$  and  $15 \text{ ng mL}^{-1}$  concentration range with a correlation coefficient of 0.9994 applying the pre-concentration procedure (Fig. 4S). The calibration equation is  $A = 0.05 C_{Zn(II)} + 0.04$ , where  $C_{Zn(II)}$  is the concentration of Zn(II) ions in  $\text{ng mL}^{-1}$ . The limit of detection (LOD) and limit of quantification (LOQ) of this method, defined as  $3S_b/m$ , and  $10S_b/m$  (where  $S_b$  is the standard deviation of six replicate measurements of the blank and  $m$  is the slope of the calibration curve) were  $0.17$  and  $0.5 \text{ ng mL}^{-1}$ , respectively.

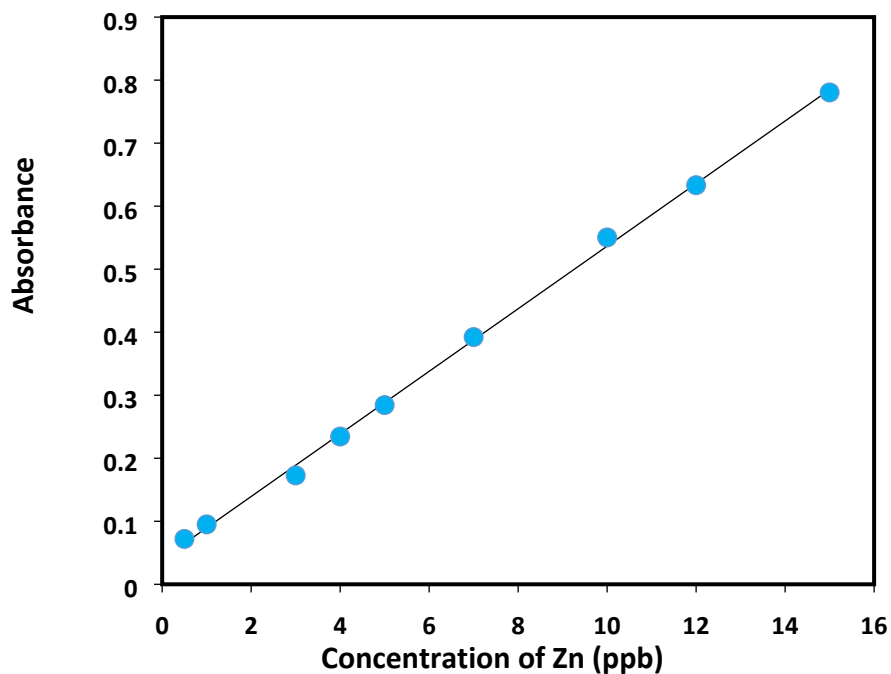

**Fig. 4S:** Calibration graph for solid-phase extraction and determination of Zn. Utilized conditions: sample volume: 150.0 mL, Zn(II) ions concentration: 5 ng mL<sup>-1</sup>, pH: 9, PAN concentration 4.0 μmol L<sup>-1</sup>, amount of the nanosorbent: 50.0 mg, extraction time :10 min, elution condition: 1.5 mL of the 0.5 mol L<sup>-1</sup> of HNO<sub>3</sub> in ethanol, desorption time: 5 min.
